# Supplementary material for: Classification of Peripheral Blood Leukocyte Phenotypes and Serum Cytokines in Vogt–Koyanagi–Harada Disease before and after Glucocorticoid Therapy
Source: MDPI journal article supplement (doi:10.3390/jcm12247742), 2023-12-17
Supplement: s1 [file s1]

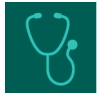

**Table S1.** Immune cell populations, phenotypes and proportions among leukocytes in peripheral blood of each VKH disease patient.

| Populations           |                                                                                                                                                                                       | VKH   |       |      |           |      |      |
|-----------------------|---------------------------------------------------------------------------------------------------------------------------------------------------------------------------------------|-------|-------|------|-----------|------|------|
| Disease Stage         |                                                                                                                                                                                       | Acute |       |      | Remission |      |      |
| Patient Number        |                                                                                                                                                                                       | No.1  | No.2  | No.3 | No.1      | No.2 | No.3 |
| Intact live cells (%) |                                                                                                                                                                                       | 100   | 100   | 100  | 100       | 100  | 100  |
| Lymphocytes           | CD3 <sup>+</sup> T cells                                                                                                                                                              | 61.1  | 80.4  | 46.1 | 41.5      | 49.2 | 9.14 |
|                       | CD8 <sup>+</sup> T cells                                                                                                                                                              | 36.0  | 39.7  | 28.5 | 22.7      | 33.1 | 6.48 |
|                       | CD3 <sup>+</sup> CD66b <sup>-</sup> CD19 <sup>-</sup> CD8 <sup>+</sup> CD4 <sup>-</sup> CD14 <sup>-</sup> CD161 <sup>-</sup> TCRγδ <sup>-</sup> CD123 <sup>-</sup> CD11c <sup>-</sup> | 7.55  | 3.51  | 4.98 | 3.14      | 4.43 | 1.56 |
|                       | Naïve                                                                                                                                                                                 | 1.95  | 1.51  | 2.31 | 0.75      | 1.68 | 0.42 |
|                       | Central memory                                                                                                                                                                        | 0.76  | 0.43  | 0.10 | 0.03      | 0.04 | 0.01 |
|                       | Effector memory                                                                                                                                                                       | 3.67  | 0.80  | 0.76 | 1.70      | 1.46 | 0.43 |
|                       | Terminal effector                                                                                                                                                                     | 1.18  | 0.77  | 1.81 | 0.66      | 1.26 | 0.70 |
|                       | CD4 <sup>+</sup> T cells                                                                                                                                                              | 25.7  | 34.1  | 22.3 | 18.2      | 25.9 | 4.44 |
|                       | Naïve                                                                                                                                                                                 | 14.7  | 25.0  | 11.9 | 10.2      | 13.8 | 2.12 |
|                       | Central memory                                                                                                                                                                        | 3.13  | 4.40  | 5.14 | 1.64      | 2.77 | 1.17 |
|                       | Effector memory                                                                                                                                                                       | 5.85  | 3.24  | 4.41 | 4.20      | 6.35 | 0.72 |
|                       | Terminal effector                                                                                                                                                                     | 2.03  | 1.30  | 0.80 | 2.12      | 2.95 | 0.43 |
|                       | Treg cells                                                                                                                                                                            | 0.73  | 0.66  | 0.36 | 0.12      | 0.59 | 0.12 |
|                       | Th1-like                                                                                                                                                                              | 0.39  | 0.50  | 0.46 | 0.30      | 1.19 | 0.24 |
|                       | Th2-like                                                                                                                                                                              | 2.28  | 2.28  | 1.94 | 0.86      | 1.73 | 0.21 |
|                       | Th17-like                                                                                                                                                                             | 3.17  | 1.24  | 2.20 | 2.66      | 2.19 | 0.36 |
|                       | γδ T cells                                                                                                                                                                            | 1.40  | 1.03  | 0.59 | 0.41      | 1.75 | 0.30 |
|                       | CD4 <sup>+</sup> T Cells                                                                                                                                                              |       |       |      |           |      |      |
|                       | MAIT/NKT cells                                                                                                                                                                        | 1.28  | 1.10  | 0.67 | 0.98      | 1.04 | 0.18 |
|                       | B cells                                                                                                                                                                               | 12.9  | 33.0  | 5.30 | 7.76      | 10.3 | 1.11 |
|                       | Naïve                                                                                                                                                                                 | 9.75  | 28.99 | 4.71 | 5.13      | 9.00 | 0.88 |
|                       | Memory                                                                                                                                                                                | 2.84  | 3.51  | 0.57 | 2.18      | 1.00 | 0.20 |
|                       | Plasmablasts                                                                                                                                                                          | 0.28  | 0.48  | 0.03 | 0.45      | 0.24 | 0.02 |
|                       | NK cells                                                                                                                                                                              | 12.3  | 7.72  | 12.3 | 11.0      | 5.83 | 1.56 |
|                       | Early                                                                                                                                                                                 | 5.97  | 2.85  | 1.31 | 3.79      | 1.73 | 0.97 |
|                       | Late                                                                                                                                                                                  | 6.33  | 4.87  | 11.0 | 7.25      | 4.11 | 0.59 |
| Monocytes             | CD3 <sup>-</sup> CD19 <sup>-</sup> CD56 <sup>-</sup> CD66b <sup>-</sup> HLA-DR <sup>+</sup> CD11c <sup>+</sup>                                                                        | 13.3  | 8.36  | 3.40 | 23.4      | 24.1 | 1.55 |
|                       | Classical                                                                                                                                                                             | 11.8  | 7.77  | 3.19 | 22.0      | 23.3 | 1.31 |
|                       | Transitional                                                                                                                                                                          | 0.94  | 0.44  | 0.19 | 1.05      | 0.73 | 0.10 |
|                       | Nonclassical                                                                                                                                                                          | 0.58  | 0.15  | 0.02 | 0.35      | 0.07 | 0.14 |
|                       | Dendritic cells                                                                                                                                                                       | 0.88  | 0.82  | 0.23 | 0.61      | 0.70 | 0.09 |
|                       | Plasmacytoid DCs                                                                                                                                                                      | 0.25  | 0.26  | 0.05 | 0.06      | 0.14 | 0.00 |
|                       | Myeloid DCs                                                                                                                                                                           | 0.62  | 0.56  | 0.18 | 0.55      | 0.55 | 0.09 |
|                       | Neutrophils + basophils + eosinophils + CD66b <sup>-</sup> neutrophils                                                                                                                | 12.1  | 4.82  | 9.81 | 15.7      | 13.9 | 86.1 |
|                       | Neutrophils                                                                                                                                                                           | 9.31  | 3.64  | 7.60 | 13.4      | 10.8 | 85.6 |
|                       | Basophils                                                                                                                                                                             | 1.89  | 0.96  | 0.75 | 0.9       | 1.94 | 0.13 |
| Granulocytes          | Eosinophils                                                                                                                                                                           | 0.38  | 0.11  | 0.46 | 0.08      | 0.22 | 0.11 |
|                       | CD66b <sup>+</sup> neutrophils                                                                                                                                                        | 0.53  | 0.11  | 1.00 | 1.30      | 0.88 | 0.30 |

Cell phenotypes are as defined by Bagwell et al [22]. Nomenclature such as dim,+ means that dim to positive events are selected. Bold font denotes classification of leukocytes based on differentiation and function. Italic font denotes the classification based on maturity stage. CD; cluster of differentiation, DCs; dendritic cells, HLA; human leukocyte antigen, MAIT; mucosal associated invariant T,

mDCs; myeloid DCs, NK; natural killer, NKT; natural killer T, pDCs; plasmacytoid DCs, Th; T helper, Tregs; regulatory T cells, VKH; Vogt-Koyanagi-Harada.

**Table S2.** Immune cell populations, phenotypes and proportions among leukocytes in peripheral blood of each healthy control.

| Populations<br>Reference Number | Model Phenotypes                                                                                                                                                                                              | Controls |      |      |      |      |       |       |
|---------------------------------|---------------------------------------------------------------------------------------------------------------------------------------------------------------------------------------------------------------|----------|------|------|------|------|-------|-------|
|                                 |                                                                                                                                                                                                               | No.1     | No.2 | No.3 | No.4 | No.5 | No.6  | No.7  |
| Intact live cells (%)           |                                                                                                                                                                                                               | 100      | 100  | 100  | 100  | 100  | 100   | 100   |
| Lymphocytes                     | CD3 T cells + B cells + NK cells + plasmablasts                                                                                                                                                               | 46.8     | 45.1 | 80.8 | 78.3 | 61.6 | 72.8  | 57.2  |
| CD3 <sup>+</sup> T cells        | CD8 T cells + CD4 T cells + $\gamma\delta$ T cells + MAIT/NKT cells                                                                                                                                           | 28.6     | 23.3 | 50.2 | 43.3 | 47.4 | 43.7  | 50.6  |
| CD8 <sup>+</sup> T cells        | CD3 <sup>+</sup> CD66b <sup>-</sup> CD19 <sup>-</sup> CD8 <sup>+</sup> CD4 <sup>-</sup> CD14 <sup>-</sup> CD161 <sup>-</sup> TCR $\gamma\delta$ <sup>-</sup> CD123 <sup>-</sup> CD11c <sup>-</sup>            | 8.14     | 8.69 | 11.3 | 16.6 | 14.6 | 15.0  | 19.0  |
| Naïve                           | CD8 T cells + CD45RA <sup>+</sup> CCR7 <sup>+</sup> CD27 <sup>+</sup>                                                                                                                                         | 1.62     | 5.96 | 4.92 | 9.02 | 7.26 | 10.77 | 14.59 |
| Central memory                  | CD8 T cells + CD45RA <sup>-</sup> CCR7 <sup>+</sup> CD27 <sup>+</sup>                                                                                                                                         | 0.10     | 0.20 | 0.33 | 0.24 | 0.13 | 0.26  | 0.11  |
| Effector memory                 | CD8 T cells + CCR7 <sup>-</sup> CD27 <sup>+</sup>                                                                                                                                                             | 1.83     | 1.57 | 2.69 | 3.06 | 1.60 | 3.07  | 1.12  |
| Terminal effector               | CD8 T cells + CCR7 <sup>-</sup> CD27 <sup>-</sup>                                                                                                                                                             | 4.59     | 0.97 | 3.33 | 4.29 | 5.61 | 0.95  | 3.21  |
| CD4 <sup>+</sup> T cells        | CD66b <sup>-</sup> CD3 <sup>+</sup> CD8 <sup>-</sup> CD4 <sup>+</sup> CD14 <sup>-</sup> TCR $\gamma\delta$ <sup>-</sup> CD11c <sup>-</sup>                                                                    | 18.4     | 11.9 | 32.0 | 23.2 | 26.2 | 22.7  | 27.7  |
| Naïve                           | CD4 T cells + CD45RA <sup>+</sup> CCR7 <sup>+</sup> CD27 <sup>+</sup>                                                                                                                                         | 12.9     | 6.54 | 18.2 | 14.2 | 14.9 | 12.0  | 21.1  |
| Central memory                  | CD4 T cells + CD45RA <sup>-</sup> CCR7 <sup>+</sup> CD27 <sup>+</sup>                                                                                                                                         | 2.09     | 1.95 | 4.86 | 1.70 | 2.62 | 2.70  | 1.18  |
| Effector memory                 | CD4 T cells + CD45RA <sup>-</sup> CCR7 <sup>-</sup> CD27 <sup>+</sup>                                                                                                                                         | 1.56     | 1.54 | 6.19 | 4.44 | 0.0  | 6.95  | 4.04  |
| Terminal effector               | CD4 T cells + CD45RA <sup>-</sup> CCR7 <sup>-</sup> CD27 <sup>-</sup>                                                                                                                                         | 1.84     | 1.90 | 2.77 | 2.85 | 8.91 | 1.02  | 1.43  |
| Treg cells                      | CD4 T cells + CD25 <sup>+</sup> CD127 <sup>-</sup> CCR4 <sup>+</sup>                                                                                                                                          | 0.47     | 0.30 | 0.97 | 0.69 | 0.44 | 0.93  | 0.40  |
| Th1-like                        | CD4 T cells + CXCR3 <sup>+</sup> CCR6 <sup>-</sup> CXCR5 <sup>-</sup> CCR4 <sup>-</sup>                                                                                                                       | 0.04     | 0.07 | 1.50 | 1.00 | 1.35 | 1.19  | 0.52  |
| Th2-like                        | CD4 T cells + CXCR3 <sup>-</sup> CCR6 <sup>-</sup> CXCR5 <sup>-</sup> CCR4 <sup>+</sup>                                                                                                                       | 1.33     | 1.36 | 1.72 | 1.19 | 2.83 | 1.08  | 1.69  |
| Th17-like                       | CD4 T cells + CXCR3 <sup>-</sup> CCR6 <sup>+</sup> CXCR5 <sup>-</sup> CCR4 <sup>+</sup>                                                                                                                       | 1.22     | 1.00 | 2.06 | 1.25 | 0.68 | 1.43  | 1.43  |
| $\gamma\delta$ T cells          | CD66b <sup>-</sup> CD3 <sup>+</sup> CD8dim <sup>-</sup> CD4 <sup>-</sup> CD14 <sup>-</sup> TCR $\gamma\delta$ dim <sup>+</sup>                                                                                | 1.10     | 2.32 | 3.16 | 1.78 | 6.51 | 2.27  | 3.03  |
| CD4 <sup>-</sup> T Cells        |                                                                                                                                                                                                               |          |      |      |      |      |       |       |
| MAIT/NKT cells                  | CD66b <sup>-</sup> CD3 <sup>+</sup> CD4 <sup>-</sup> CD14 <sup>-</sup> CD161 <sup>+</sup> TCR $\gamma\delta$ <sup>-</sup> CD28 <sup>+</sup> CD16 <sup>-</sup>                                                 | 0.92     | 0.39 | 3.80 | 1.72 | 0    | 3.69  | 0.79  |
| B cells                         | CD3 <sup>-</sup> CD14 <sup>-</sup> CD56 <sup>-</sup> CD16 dim <sup>-</sup> CD19 <sup>+</sup> CD20 <sup>+</sup> HLA-DR dim <sup>+</sup>                                                                        | 7.52     | 5.50 | 10.5 | 10.7 | 11.8 | 13.5  | 2.05  |
| Naïve                           | B cells + CD27 <sup>-</sup>                                                                                                                                                                                   | 5.64     | 4.12 | 7.40 | 8.42 | 9.37 | 10.30 | 1.86  |
| Memory                          | B cells + CD27 <sup>+</sup>                                                                                                                                                                                   | 1.82     | 1.32 | 3.04 | 2.08 | 2.38 | 3.11  | 0.15  |
| Plasmablasts                    | CD3 <sup>-</sup> CD14 <sup>-</sup> CD16 <sup>-</sup> dim CD66b <sup>-</sup> CD20 <sup>-</sup> CD19 <sup>+</sup> CD56 <sup>-</sup> CD38 <sup>++</sup> CD27 <sup>+</sup>                                        | 0.06     | 0.06 | 0.06 | 0.25 | 0.07 | 0.05  | 0.04  |
| NK cells                        | CD14 <sup>-</sup> CD3 <sup>-</sup> CD123 <sup>-</sup> CD66b <sup>-</sup> CD45RA <sup>+</sup> CD56 dim <sup>+</sup>                                                                                            | 10.7     | 16.2 | 20.1 | 24.3 | 2.43 | 15.7  | 4.60  |
| Early                           | NK cells + CD57 <sup>-</sup>                                                                                                                                                                                  | 2.36     | 6.13 | 9.78 | 5.70 | 1.52 | 6.78  | 1.61  |
| Late                            | NK cells + CD57 <sup>+</sup>                                                                                                                                                                                  | 8.31     | 10.1 | 11.3 | 18.6 | 0.91 | 8.89  | 3.00  |
| Monocytes                       | CD3 <sup>-</sup> CD19 <sup>-</sup> CD56 <sup>-</sup> CD66b <sup>-</sup> HLA-DR <sup>+</sup> CD11c <sup>+</sup>                                                                                                | 5.78     | 10.2 | 6.15 | 9.88 | 9.65 | 11.1  | 8.42  |
| Classical                       | Monocytes + CD14 <sup>+</sup> CD38 <sup>+</sup>                                                                                                                                                               | 4.29     | 8.59 | 5.61 | 9.02 | 8.55 | 8.77  | 6.79  |
| Transitional                    | Monocytes + CD14 dim CD38 dim                                                                                                                                                                                 | 0.81     | 1.12 | 0.43 | 0.69 | 0.82 | 1.69  | 1.14  |
| Nonclassical                    | Monocytes + CD14 <sup>-</sup> CD38 <sup>-</sup>                                                                                                                                                               | 0.68     | 0.48 | 0.11 | 0.17 | 0.27 | 0.63  | 0.48  |
| Dendritic cells                 | pDCs <sup>+</sup> mDCs                                                                                                                                                                                        | 0.63     | 0.85 | 0.79 | 1.00 | 0.48 | 1.08  | 0.50  |
| Plasmacytoid DCs                | CD3 <sup>-</sup> CD19 <sup>-</sup> CD14 <sup>-</sup> CD20 <sup>-</sup> CD66b <sup>-</sup> HLA-DR dim <sup>+</sup> CD11c <sup>-</sup> CD123 <sup>+</sup>                                                       | 0.12     | 0.10 | 0.14 | 0.35 | 0.03 | 0.24  | 0.05  |
| Myeloid DCs                     | CD3 <sup>-</sup> CD19 <sup>-</sup> CD14 <sup>-</sup> CD20 <sup>-</sup> HLA-DR dim <sup>+</sup> CD11c dim <sup>+</sup> CD123 <sup>-</sup> CD16 dim <sup>-</sup> CD38 dim <sup>+</sup> CD294 <sup>-</sup> HLA-D | 0.51     | 0.75 | 0.65 | 0.65 | 0.45 | 0.84  | 0.46  |
| Granulocytes                    | Neutrophils + basophils + eosinophils + CD66b <sup>-</sup> neutrophils                                                                                                                                        | 36.3     | 31.9 | 3.41 | 3.26 | 17.0 | 8.23  | 19.8  |
| Neutrophils                     | CD66b dim <sup>+</sup> CD16 <sup>+</sup> HLA-DR <sup>-</sup>                                                                                                                                                  | 34.3     | 28.6 | 1.67 | 1.60 | 16.4 | 5.58  | 18.7  |
| Basophils                       | HLA-DR <sup>-</sup> CD66b <sup>-</sup> CD123 dim <sup>+</sup> CD38 <sup>+</sup> CD294 <sup>+</sup>                                                                                                            | 0.91     | 1.46 | 1.12 | 1.08 | 0.04 | 2.12  | 0     |
| Eosinophils                     | CD14 <sup>-</sup> CD3 <sup>-</sup> CD19 <sup>-</sup> HLA-DR <sup>-</sup> CD294 <sup>+</sup> CD66b dim <sup>+</sup>                                                                                            | 0.87     | 1.14 | 0.01 | 0.02 | 0.25 | 0.04  | 0.04  |
| CD66b <sup>-</sup> neutrophils  | CD3 <sup>-</sup> CD19 <sup>-</sup> CD66b <sup>-</sup> CD56 <sup>-</sup> HLA-DR <sup>-</sup> CD123 <sup>-</sup> CD45 <sup>-</sup>                                                                              | 0.29     | 0.74 | 0.60 | 0.57 | 0.32 | 0.49  | 1.06  |

**Table S3.** Hematologic data of No. 1 VKH disease patient.

| Acute         |        |                           |                 |                |        |       |                 |
|---------------|--------|---------------------------|-----------------|----------------|--------|-------|-----------------|
| Test Item     | Result | Unit                      | Reference Value | Test Item      | Result | Unit  | Reference Value |
| Blood count   |        |                           |                 | Endocrine      |        |       |                 |
| RBC           | 4.14   | x 10 <sup>6</sup> /μL     | 4.35 ~ 5.55     | sIL-2R         | 261    | U/mL  | 157 ~ 474       |
| Hb            | 13.4   | g/dL                      | 13.7 ~ 16.8     | Immunity       |        |       |                 |
| Ht            | 41.6   | %                         | 40.0 ~ 50.0     | CRP            | ≤ 0.3  | mg/dL | ≤ 0.3           |
| MCV           | 100.5  | fL                        | 83.6 ~ 98.2     | Toxoplasma IgG | < 1.6  | IU/mL | < 1.6           |
| MCH           | 32.4   | pg                        | 27.5 ~ 33.2     | Toxoplasma IgM | 0.14   | S/CO  | < 0.83          |
| MCHC          | 32.2   | %                         | 31.7 ~ 35.3     | IgG            | 1048   | mg/dL | 870 ~ 1700      |
| RDW           | 12.8   | fL                        | 11.6 ~ 14.0     | IgA            | 199    | mg/dL | 110 ~ 410       |
| WBC           | 6.50   | x 10 <sup>3</sup> /μL     | 3.3 ~ 8.6       | IgM            | 36     | mg/dL | 35 ~ 220        |
| Neutrophil    | 63.2   | %                         | 38.5 ~ 80.5     | Infection      |        |       |                 |
| Lymphocyte    | 28.0   | %                         | 16.5 ~ 49.5     | RPR            | (-)    |       | (-)             |
| MONO          | 6.3    | %                         | 2.0 ~ 10.0      | TPHA           | (-)    |       | (-)             |
| EOSINO        | 1.9    | %                         | 0 ~ 8.5         | HBsAg          | (-)    |       | (-)             |
| BASO          | 0.6    | %                         | 0 ~ 2.5         | Anti-HCV Ab    | 0.1    |       | < 0.1           |
| Platelet      | 316    | x 10 <sup>3</sup> /μL     | 158 ~ 348       | Anti-HIV Ab    |        |       | (-)             |
| Biochemistry  |        |                           |                 | Anti-HSV Ab    | < 4    | times | < 4             |
| T-Bil         | 0.50   | mg/dL                     | 0.2 ~ 1.2       | Anti-VZV Ab    | 8      | times | < 4             |
| AST           | 21     | U/L                       | 8 ~ 30          | Anti-CMV Ab    | < 4    | times | < 4             |
| ALT           | 13     | U/L                       | 5 ~ 35          | Coagulation    |        |       |                 |
| LDH           | 191    | U/L                       | 100 ~ 225       | PT             |        |       |                 |
| Total protein | 7.0    | mg/dL                     | 6.5 ~ 8.2       | Time           | 10.3   | sec   | 9.9 ~ 11.8      |
| FBS           | 89     | mg/dL                     | 65 ~ 110        | Activity       | 108.3  | %     | 80 ~ 127        |
| HbA1c         | 5.4    | %                         | 4.6 ~ 6.2       | PT-INR         | 0.96   |       | 0.9 ~ 1.1       |
| BUN           | 14     | mg/dL                     | 8 ~ 20          | APTT           |        |       |                 |
| Creatinine    | 0.77   | mg/dL                     | 0.61 ~ 1.13     | Time           | 28.1   | sec   | 24.0 ~ 32.0     |
| Na            | 141    | mmol/L                    | 135 ~ 147       | Fibrinogen     | 339    | mg/dL | 180 ~ 400       |
| K             | 4.1    | mmol/L                    | 3.5 ~ 5.0       | ESR (1 hour)   | 15     | mm    | 1 ~ 7           |
| Cl            | 102    | mmol/L                    | 98 ~ 108        |                |        |       |                 |
| Ca            | 9.4    | mmol/L                    | 8.5 ~ 10.3      |                |        |       |                 |
| ACE           | 7.4    | IU/L                      | 7.7 ~ 29.4      |                |        |       |                 |
| eGFR          | 77.6   | mL/min/1.73m <sup>2</sup> |                 |                |        |       |                 |
| Remission     |        |                           |                 |                |        |       |                 |
| Test item     | Result | Unit                      | Reference value | Test item      | Result | Unit  | Reference value |
| Blood count   |        |                           |                 | Endocrine      |        |       |                 |
| RBC           | 4.14   | x 10 <sup>6</sup> /μL     | 4.35 ~ 5.55     | sIL-2R         | 261    | U/mL  | 157 ~ 474       |
| Hb            | 13.4   | g/dL                      | 13.7 ~ 16.8     | Immunity       |        |       |                 |
| Ht            | 41.6   | %                         | 40.0 ~ 50.0     | CRP            | ≤ 0.3  | mg/dL | ≤ 0.3           |
| MCV           | 100.5  | fL                        | 83.6 ~ 98.2     | Toxoplasma IgG | < 1.6  | IU/mL | < 1.6           |
| MCH           | 32.4   | pg                        | 27.5 ~ 33.2     | Toxoplasma IgM | 0.14   | S/CO  | < 0.83          |
| MCHC          | 32.2   | %                         | 31.7 ~ 35.3     | IgG            | 1048   | mg/dL | 870 ~ 1700      |
| RDW           | 12.8   | fL                        | 11.6 ~ 14.0     | IgA            | 199    | mg/dL | 110 ~ 410       |
| WBC           | 6.50   | x 10 <sup>3</sup> /μL     | 3.3 ~ 8.6       | IgM            | 36     | mg/dL | 35 ~ 220        |
| Neutrophil    | 63.2   | %                         | 38.5 ~ 80.5     | Infection      |        |       |                 |
| Lymphocyte    | 28.0   | %                         | 16.5 ~ 49.5     | RPR            | (-)    |       | (-)             |
| MONO          | 6.3    | %                         | 2.0 ~ 10.0      | TPHA           | (-)    |       | (-)             |

|                     |      |                             |             |                    |       |                 |
|---------------------|------|-----------------------------|-------------|--------------------|-------|-----------------|
| EOSINO              | 1.9  | %                           | 0 ~ 8.5     | HBsAg              | (-)   | (-)             |
| BASO                | 0.6  | %                           | 0 ~ 2.5     | Anti-HCV Ab        | 0.1   | < 0.1           |
| Platelet            | 316  | $\times 10^3 / \mu\text{L}$ | 158 ~ 348   | Anti-HIV Ab        |       | (-)             |
| <b>Biochemistry</b> |      |                             |             | Anti-HSV Ab        | < 4   | times < 4       |
| T-Bil               | 0.50 | mg/dL                       | 0.2 ~ 1.2   | Anti-VZV Ab        | 8     | times < 4       |
| AST                 | 21   | U/L                         | 8 ~ 30      | Anti-CMV Ab        | < 4   | times < 4       |
| ALT                 | 13   | U/L                         | 5 ~ 35      | <b>Coagulation</b> |       |                 |
| LDH                 | 191  | U/L                         | 100 ~ 225   | PT                 |       |                 |
| Total protein       | 7.0  | mg/dL                       | 6.5 ~ 8.2   | Time               | 10.3  | sec 9.9 ~ 11.8  |
| FBS                 | 89   | mg/dL                       | 65 ~ 110    | Activity           | 108.3 | % 80 ~ 127      |
| HbA1c               | 5.4  | %                           | 4.6 ~ 6.2   | PT-INR             | 0.96  | 0.9 ~ 1.1       |
| BUN                 | 14   | mg/dL                       | 8 ~ 20      | APTT               |       |                 |
| Creatinine          | 0.77 | mg/dL                       | 0.61 ~ 1.13 | Time               | 28.1  | sec 24.0 ~ 32.0 |
| Na                  | 141  | mmol/L                      | 135 ~ 147   | Fibrinogen         | 339   | mg/dL 180 ~ 400 |
| K                   | 4.1  | mmol/L                      | 3.5 ~ 5.0   | ESR (1 hour)       | 15    | mm 1 ~ 7        |
| Cl                  | 102  | mmol/L                      | 98 ~ 108    |                    |       |                 |
| Ca                  | 9.4  | mmol/L                      | 8.5 ~ 10.3  |                    |       |                 |
| ACE                 | 7.4  | IU/L                        | 7.7 ~ 29.4  |                    |       |                 |
| eGFR                | 77.6 | mL/min/1.73m <sup>2</sup>   |             |                    |       |                 |

IgG and IgM levels of toxoplasma are determined by enzyme immunoassay. ACE; angiotensin converting enzyme, ALT; alanine aminotransferase, APTT; activated partial thromboplastin time, AST; aspartate transaminase, BUN; blood urea nitrogen, Ca; calcium, Cl; chlorine, CMV; cytomegalovirus, CRP; C-reactive protein, eGFR; estimated glomerular filtration rate, ESR; erythrocyte sedimentation rate, FBS; fasting blood sugar, Hb; hemoglobin, HBsAg; hepatitis B surface antigen, HCV; hepatitis C virus, HIV; human immunodeficiency virus, HSV; herpes simplex virus, Ht; hematocrit, Ig; immunoglobulin, K; potassium, LDH; lactate dehydrogenase, Na; sodium, MCH; mean corpuscular hemoglobin, MCHC; mean corpuscular hemoglobin concentration, MCV; mean corpuscular volume, PT; prothrombin time, PT-INR; prothrombin time-international normalized ratio, RPR; rapid plasma reagin, RBC; red blood cell, RDW; red blood cell distribution width, sIL-2R; soluble interleukin-2 receptor, TPHA; treponema pallidum hemagglutination test, VZV; varicella-zoster virus, WBC; white blood cells.

**Table S4.** Hematologic data of No. 2 VKH disease patient.

| Acute               |        |                                       |                 |                    |            |       |                 |
|---------------------|--------|---------------------------------------|-----------------|--------------------|------------|-------|-----------------|
| Test item           | Result | Unit                                  | Reference value | Test item          | Result     | Unit  | Reference value |
| <b>Blood count</b>  |        |                                       |                 | <b>Endocrine</b>   |            |       |                 |
| RBC                 | 4.29   | $\times 10^6/\mu\text{L}$             | 4.35 ~ 5.55     | sIL-2R             | 383        | U/mL  | 157 ~ 474       |
| Hb                  | 14.2   | g/dL                                  | 13.7 ~ 16.8     | <b>Immunity</b>    |            |       |                 |
| Ht                  | 43.2   | %                                     | 40.0 ~ 50.0     | CRP                | $\leq 0.3$ | mg/dL | $\leq 0.3$      |
| MCV                 | 100.7  | fL                                    | 83.6 ~ 98.2     | Toxoplasma IgG     | (-)        | IU/mL | < 1.6           |
| MCH                 | 33.1   | pg                                    | 27.5 ~ 33.2     | Toxoplasma IgM     | (-)        | S/CO  | < 0.83          |
| MCHC                | 32.9   | %                                     | 31.7 ~ 35.3     | IgG                | 1129       | mg/dL | 870 ~ 1700      |
| RDW                 | 13.2   | fL                                    | 11.6 ~ 14.0     | IgA                | 158        | mg/dL | 110 ~ 410       |
| WBC                 | 6.10   | $\times 10^3/\mu\text{L}$             | 3.3 ~ 8.6       | IgM                | 80         | mg/dL | 35 ~ 220        |
| Neutrophil          | 55.6   | %                                     | 38.5 ~ 80.5     | <b>Infection</b>   |            |       |                 |
| Lymphocyte          | 35.6   | %                                     | 16.5 ~ 49.5     | RPR                | (-)        |       | (-)             |
| MONO                | 5.7    | %                                     | 2.0 ~ 10.0      | TPHA               | (-)        |       | (-)             |
| EOSINO              | 2.6    | %                                     | 0 ~ 8.5         | HBsAg              | (-)        |       | (-)             |
| BASO                | 0.5    | %                                     | 0 ~ 2.5         | Anti-HCV Ab        | 0.1        |       | < 0.1           |
| Platelet            | 258    | $\times 10^3/\mu\text{L}$             | 158 ~ 348       | Anti-HIV Ab        |            |       | (-)             |
| <b>Biochemistry</b> |        |                                       |                 | Anti-HSV Ab        | 32         | times | < 4             |
| T-Bil               | 0.59   | mg/dL                                 | 0.2 ~ 1.2       | Anti-VZV Ab        | 8          | times | < 4             |
| AST                 | 21     | U/L                                   | 8 ~ 30          | Anti-CMV Ab        | < 4        | times | < 4             |
| ALT                 | 18     | U/L                                   | 5 ~ 35          | <b>Coagulation</b> |            |       |                 |
| LDH                 | 208    | U/L                                   | 100 ~ 225       | PT                 |            |       |                 |
| Total protein       | 7.3    | mg/dL                                 | 6.5 ~ 8.2       | Time               | 10.8       | sec   | 9.9 ~ 11.8      |
| FBS                 | 96     | mg/dL                                 | 65 ~ 110        | Activity           | 97.5       | %     | 80 ~ 127        |
| HbA1c               | 5.8    | %                                     | 4.6 ~ 6.2       | PT-INR             | 1.01       |       | 0.9 ~ 1.1       |
| BUN                 | 9      | mg/dL                                 | 8 ~ 20          | APTT               |            |       |                 |
| Creatinine          | 0.66   | mg/dL                                 | 0.61 ~ 1.13     | Time               | 30.9       | sec   | 24.0 ~ 32.0     |
| Na                  | 143    | mmol/L                                | 135 ~ 147       | Fibrinogen         | 404        | mg/dL | 180 ~ 400       |
| K                   | 3.9    | mmol/L                                | 3.5 ~ 5.0       | ESR (1 hour)       | 32         | mm    | 1 ~ 7           |
| Cl                  | 106    | mmol/L                                | 98 ~ 108        |                    |            |       |                 |
| Ca                  | 9.4    | mmol/L                                | 8.5 ~ 10.3      |                    |            |       |                 |
| CK                  | 77     | U/L                                   | $\leq 160$      |                    |            |       |                 |
| ACE                 | 12.6   | IU/L                                  | 7.7 ~ 29.4      |                    |            |       |                 |
| eGFR                | 71.9   | $\text{mL}/\text{min}/1.73\text{m}^2$ |                 |                    |            |       |                 |
| Remission           |        |                                       |                 |                    |            |       |                 |
| Test item           | Result | Unit                                  | Reference value | Test item          | Result     | Unit  | Reference value |
| <b>Blood count</b>  |        |                                       |                 | <b>Immunity</b>    |            |       |                 |
| RBC                 | 4.15   | $\times 10^6/\mu\text{L}$             | 4.35 ~ 5.55     | CRP                | 0.7        | mg/dL | $\leq 0.3$      |
| Hb                  | 13.9   | g/dL                                  | 13.7 ~ 16.8     |                    |            |       |                 |
| Ht                  | 42.5   | %                                     | 40.0 ~ 50.0     |                    |            |       |                 |
| MCV                 | 102.4  | fL                                    | 83.6 ~ 98.2     |                    |            |       |                 |
| MCH                 | 33.5   | pg                                    | 27.5 ~ 33.2     |                    |            |       |                 |
| MCHC                | 32.7   | %                                     | 31.7 ~ 35.3     |                    |            |       |                 |
| RDW                 | 12.6   | fL                                    | 11.6 ~ 14.0     |                    |            |       |                 |
| WBC                 | 5.00   | $\times 10^3/\mu\text{L}$             | 3.3 ~ 8.6       |                    |            |       |                 |
| Neutrophil          | 61.6   | %                                     | 38.5 ~ 80.5     |                    |            |       |                 |
| Lymphocyte          | 25     | %                                     | 16.5 ~ 49.5     |                    |            |       |                 |

|                     |      |                             |             |
|---------------------|------|-----------------------------|-------------|
| MONO                | 11.6 | %                           | 2.0 ~ 10.0  |
| EOSINO              | 1.6  | %                           | 0 ~ 8.5     |
| BASO                | 0.2  | %                           | 0 ~ 2.5     |
| Platelet            | 234  | $\times 10^3 / \mu\text{L}$ | 158 ~ 348   |
| <b>Biochemistry</b> |      |                             |             |
| T-Bil               | 0.30 | mg/dL                       | 0.2 ~ 1.2   |
| AST                 | 24   | U/L                         | 8 ~ 30      |
| LDH                 | 228  | U/L                         | 100 ~ 225   |
| ALP                 | 69   | U/L                         | 38 ~ 113    |
| Total protein       | 6.3  | mg/dL                       | 6.5 ~ 8.2   |
| BUN                 | 23   | mg/dL                       | 8 ~ 20      |
| Creatinine          | 0.82 | mg/dL                       | 0.61 ~ 1.13 |
| Na                  | 142  | mmol/L                      | 135 ~ 147   |
| K                   | 3.6  | mmol/L                      | 3.5 ~ 5.0   |
| Cl                  | 106  | mmol/L                      | 98 ~ 108    |
| Ca                  | 9.4  | mmol/L                      | 8.5 ~ 10.3  |

CK; creatine kinase.

**Table S5.** Hematologic data of No. 3 VKH disease patient.

| Acute               |        |                             |                 |                    |            |       |                 |
|---------------------|--------|-----------------------------|-----------------|--------------------|------------|-------|-----------------|
| Test item           | Result | Unit                        | Reference value | Test item          | Result     | Unit  | Reference value |
| <b>Blood count</b>  |        |                             |                 | <b>Immunity</b>    |            |       |                 |
| RBC                 | 4.42   | $\times 10^6 / \mu\text{L}$ | 4.35 ~ 5.55     | CRP                | $\leq 0.3$ | mg/dL | $\leq 0.3$      |
| Hb                  | 13.1   | g/dL                        | 13.7 ~ 16.8     | Toxoplasma IgG     | < 1.6      | IU/mL | < 1.6           |
| Ht                  | 40.3   | %                           | 40.0 ~ 50.0     | Toxoplasma IgM     | 0.14       | S/CO  | < 0.83          |
| MCV                 | 91.2   | fL                          | 83.6 ~ 98.2     | IgG                | 1256       | mg/dL | 870 ~ 1700      |
| MCH                 | 29.6   | pg                          | 27.5 ~ 33.2     | IgA                | 519        | mg/dL | 110 ~ 410       |
| MCHC                | 32.5   | %                           | 31.7 ~ 35.3     | IgM                | 52         | mg/dL | 35 ~ 220        |
| RDW                 | 12.2   | fL                          | 11.6 ~ 14.0     | <b>Infection</b>   |            |       |                 |
| WBC                 | 5.50   | $\times 10^3 / \mu\text{L}$ | 3.3 ~ 8.6       | RPR                | (-)        |       | (-)             |
| Neutrophil          | 60.6   | %                           | 38.5 ~ 80.5     | TPHA               | (-)        |       | (-)             |
| Lymphocyte          | 32.4   | %                           | 16.5 ~ 49.5     | HBsAg              | (-)        |       | (-)             |
| MONO                | 5.2    | %                           | 2.0 ~ 10.0      | Anti-HCV Ab        | 0.1        |       | < 0.1           |
| EOSINO              | 1.4    | %                           | 0 ~ 8.5         | Anti-HIV Ab        |            |       | (-)             |
| BASO                | 0.4    | %                           | 0 ~ 2.5         | Anti-HSV Ab        | < 4        | times | < 4             |
| Platelet            | 272    | $\times 10^3 / \mu\text{L}$ | 158 ~ 348       | Anti-VZV Ab        | 8          | times | < 4             |
| <b>Biochemistry</b> |        |                             |                 | Anti-CMV Ab        | 8          | times | < 4             |
| T-Bil               | 1.41   | mg/dL                       | 0.2 ~ 1.2       | <b>Coagulation</b> |            |       |                 |
| AST                 | 26     | U/L                         | 8 ~ 30          | PT                 |            |       |                 |
| ALT                 | 21     | U/L                         | 5 ~ 35          | Time               | 10.1       | sec   | 9.9 ~ 11.8      |
| LDH                 | 221    | U/L                         | 100 ~ 225       | Activity           | 103.0      | %     | 80 ~ 127        |
| Total protein       | 7.8    | mg/dL                       | 6.5 ~ 8.2       | PT-INR             | 0.99       |       | 0.9 ~ 1.1       |
| FBS                 | 93     | mg/dL                       | 65 ~ 110        | APTT               |            |       |                 |
| HbA1c               | 5.9    | %                           | 4.6 ~ 6.2       | Time               | 28.1       | sec   | 24.0 ~ 32.0     |
| BUN                 | 18     | mg/dL                       | 8 ~ 20          | Fibrinogen         | 310        | mg/dL | 180 ~ 400       |
| Creatinine          | 0.95   | mg/dL                       | 0.61 ~ 1.13     | ESR (1 hour)       | 29         | mm    | 1 ~ 7           |
| Na                  | 143    | mmol/L                      | 135 ~ 147       |                    |            |       |                 |

| K                   | 4.3    | mmol/L                    | 3.5 ~ 5.0       |                    |        |       |                 |
|---------------------|--------|---------------------------|-----------------|--------------------|--------|-------|-----------------|
| Cl                  | 105    | mmol/L                    | 98 ~ 108        |                    |        |       |                 |
| Ca                  | 10.1   | mmol/L                    | 8.5 ~ 10.3      |                    |        |       |                 |
| ACE                 | 21     | IU/L                      | 7.7 ~ 29.4      |                    |        |       |                 |
| eGFR                | 43.9   | mL/min/1.73m <sup>2</sup> |                 |                    |        |       |                 |
| Remission           |        |                           |                 |                    |        |       |                 |
| Test item           | Result | Unit                      | Reference value | Test item          | Result | Unit  | Reference value |
| <b>Blood count</b>  |        |                           |                 | <b>Endocrine</b>   |        |       |                 |
| RBC                 | 4.33   | x 10 <sup>6</sup> /μL     | 4.35 ~ 5.55     | sIL-2R             | 261    | U/mL  | 157 ~ 474       |
| Hb                  | 13.3   | g/dL                      | 13.7 ~ 16.8     | <b>Immunity</b>    |        |       |                 |
| Ht                  | 40     | %                         | 40.0 ~ 50.0     | CRP                | ≤0.14  | mg/dL | ≤ 0.3           |
| MCV                 | 92.4   | fL                        | 83.6 ~ 98.2     | <b>Infection</b>   |        |       |                 |
| MCH                 | 30.7   | pg                        | 27.5 ~ 33.2     | RPR                | (-)    |       | (-)             |
| MCHC                | 33.3   | %                         | 31.7 ~ 35.3     | TPHA               | (-)    |       | (-)             |
| RDW                 | 11.9   | fL                        | 11.6 ~ 14.0     | HBsAg              | (-)    |       | (-)             |
| WBC                 | 7.00   | x 10 <sup>3</sup> /μL     | 3.3 ~ 8.6       | Anti-HCV Ab        | 0.1    |       | < 0.1           |
| Neutrophil          | 77.5   | %                         | 38.5 ~ 80.5     | Anti-HIV Ab        | (-)    |       | (-)             |
| Lymphocyte          | 20.2   | %                         | 16.5 ~ 49.5     | <b>Coagulation</b> |        |       |                 |
| MONO                | 1.9    | %                         | 2.0 ~ 10.0      | PT                 |        |       |                 |
| EOSINO              | 0.3    | %                         | 0 ~ 8.5         | Time               | 10.3   | sec   | 9.9 ~ 11.8      |
| BASO                | 0.1    | %                         | 0 ~ 2.5         | Activity           | 114.2  | %     | 80 ~ 127        |
| Platelet            | 239    | x 10 <sup>3</sup> /μL     | 158 ~ 348       | PT-INR             | 0.94   |       | 0.9 ~ 1.1       |
| <b>Biochemistry</b> |        |                           |                 | APTT               |        |       |                 |
| T-Bil               | 1.30   | mg/dL                     | 0.2 ~ 1.2       | Time               | 25.8   | sec   | 24.0 ~ 32.0     |
| AST                 | 27     | U/L                       | 8 ~ 30          |                    |        |       |                 |
| ALT                 | 21     | U/L                       | 5 ~ 35          |                    |        |       |                 |
| LDH                 | 276    | U/L                       | 100 ~ 225       |                    |        |       |                 |
| FBS                 | 103    | mg/dL                     | 65 ~ 110        |                    |        |       |                 |
| HbA1c               | 6.0    | %                         | 4.6 ~ 6.2       |                    |        |       |                 |
| BUN                 | 19     | mg/dL                     | 8 ~ 20          |                    |        |       |                 |
| Creatinine          | 0.93   | mg/dL                     | 0.61 ~ 1.13     |                    |        |       |                 |
| Na                  | 141    | mmol/L                    | 135 ~ 147       |                    |        |       |                 |
| K                   | 4.2    | mmol/L                    | 3.5 ~ 5.0       |                    |        |       |                 |
| Cl                  | 106    | mmol/L                    | 98 ~ 108        |                    |        |       |                 |
| eGFR                | 44.8   | mL/min/1.73m <sup>2</sup> |                 |                    |        |       |                 |

Table S6. Serum cytokine levels in each VKH disease patient.

| Category       |        | VKH   |       |        |           |       | Detection range |    |         |
|----------------|--------|-------|-------|--------|-----------|-------|-----------------|----|---------|
| Disease stage  |        | Acute |       |        | Remission |       |                 |    |         |
| Patient number | No. 1  | No. 2 | No. 3 | No. 1  | No. 2     | No. 3 |                 |    |         |
| PDGF-BB        | 1255.7 | 118.9 | 345.4 | 1232.0 | 54.0      | 288.4 | 7.67            | to | 42619.2 |
| IL-1β          | 0.54   | 0.39  | 0     | 0      | 0         | 0     | 0.28            | to | 5036.8  |
| IL-1ra         | 24.0   | 21.6  | 36.1  | 31.2   | 42.1      | 36.1  | 8.56            | to | 37276.7 |
| IL-2           | 0      | 0     | 0     | 0      | 0         | 0     | 1.50            | to | 8778.3  |
| IL-4           | 1.63   | 1.22  | 4.16  | 3.46   | 3.44      | 4.69  | 0.16            | to | 3539.9  |
| IL-5           | 0      | 0     | 0     | 0      | 0         | 0     | 4.02            | to | 85349.0 |
| IL-6           | 0      | 0     | 0     | 0      | 0         | 0     | 0.37            | to | 5969.6  |
| IL-7           | 33.7   | 51.7  | 0     | 0      | 25.6      | 0     | 1.84            | to | 36229.8 |
| IL-8           | 0      | 0     | 2.55  | 1.30   | 1.50      | 2.82  | 0.51            | to | 10416.3 |
| IL-9           | 27.4   | 20.9  | 49.1  | 44.4   | 47.2      | 43.2  | 0.92            | to | 21827.0 |
| IL-10          | 0      | 39.8  | 0     | 0      | 18.4      | 0     | 0.84            | to | 12755.7 |
| IL-12          | 0      | 24.9  | 0     | 0      | 0         | 0     | 1.58            | to | 21263.1 |

|                |        |       |       |       |       |       |      |    |         |
|----------------|--------|-------|-------|-------|-------|-------|------|----|---------|
| IL-13          | 0      | 4.36  | 0     | 0     | 0     | 0     | 0.75 | to | 5003.2  |
| IL-15          | 0      | 0     | 0     | 0     | 0     | 0     | #### | to | 76422.6 |
| IL-17A         | 5.20   | 3.38  | 0     | 0     | 3.05  | 4.21  | 2.65 | to | 35294.2 |
| Eotaxin        | 139.6  | 98.4  | 196.6 | 168.8 | 19.4  | 191.5 | 0.09 | to | 1487.0  |
| bFGF           | 5.99   | 4.94  | 0     | 0     | 0     | 0     | 3.52 | to | 5445.8  |
| G-CSF          | 0      | 519.8 | 142.8 | 99.3  | 362.0 | 166.5 | 55.0 | to | 70102.6 |
| GM-CSF         | 0      | 0     | 0     | 0     | 0     | 0     | 0.33 | to | 1822.9  |
| IFN- $\gamma$  | 0      | 0     | 0     | 0     | 0     | 1.75  | 0.74 | to | 22825.9 |
| IP-10          | 542.8  | 847.2 | 153.0 | 52.3  | 70.5  | 133.0 | 1.53 | to | 23765.1 |
| MCP-1          | 5.10   | 4.25  | 8.45  | 8.78  | 7.16  | 5.80  | 0.34 | to | 5761.9  |
| MIP-1 $\alpha$ | 0.19   | 0     | 1.18  | 0.53  | 0.45  | 2.37  | 0.05 | to | 348.6   |
| MIP-1 $\beta$  | 27.1   | 22.6  | 26.3  | 18.8  | 23.0  | 36.6  | 0.46 | to | 2126.1  |
| RANTES         | 1010.2 | 937.3 | 748.6 | 649.4 | 210.7 | 580.3 | 1.00 | to | 5544.2  |
| TNF $\alpha$   | 15.5   | 0     | 7.32  | 21.1  | 0     | 13.4  | 2.73 | to | 53796.5 |
| VEGF-A         | 0      | 0     | 0     | 0     | 0     | 0     | 19.5 | to | 69174.0 |

bFGF; basic fibroblast growth factor, G-CSF; granulocyte colony-stimulating factor, GM-CSF; granulocyte macrophage colony-stimulating factor, IFN; interferon, IP-10; interferon gamma-induced protein 10, IL; interleukin, MIP; macrophage inflammatory protein, MCP; monocyte chemotactic protein, PDGF; platelet derived growth factor, ra; receptor antagonist, RANTES; regulated on activation, normal T-cell expressed and secreted, TNF; tumor necrosis factor, VEGF; vascular endothelial growth factor.

**Table S7.** Serum cytokine levels in each control.

[illegible]



**Figure S1.** Clinical course of No. 1 VKH disease patient under glucocorticoid therapy.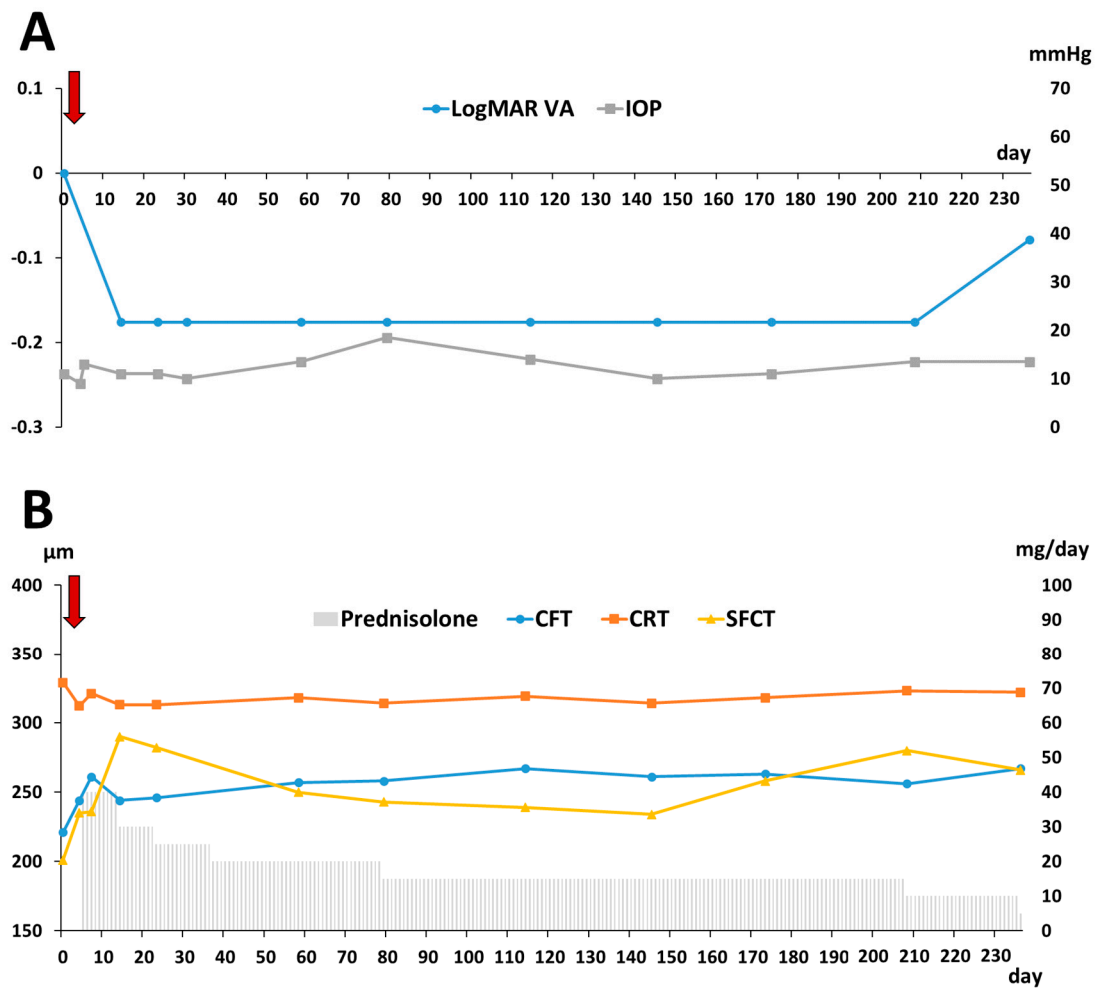

Time courses of (A) logMAR VA, IOP, and (B) dose of prednisolone, CFT, CRT, SFCT in No.1 VKH disease patient under GC therapy are shown. Left vertical axis shows logMAR VA in (A), CFT, CRT, SFCT in (B), and right vertical axis means IOP in (A), dose of prednisolone in (B). Horizontal axis denotes number of days passed since first medical examination. Red arrows in (A, B) indicate intravenous pulses of methylprednisolone (1,000 mg/day for 3 days). CFT; central foveal thickness, CRT; central retinal thickness, GC; glucocorticoid, SFCT; subfoveal choroidal thickness. VKH; Vogt-Koyanagi-Harada.

**Figure S2.** Clinical course of No. 2 VKH disease patient under glucocorticoid therapy.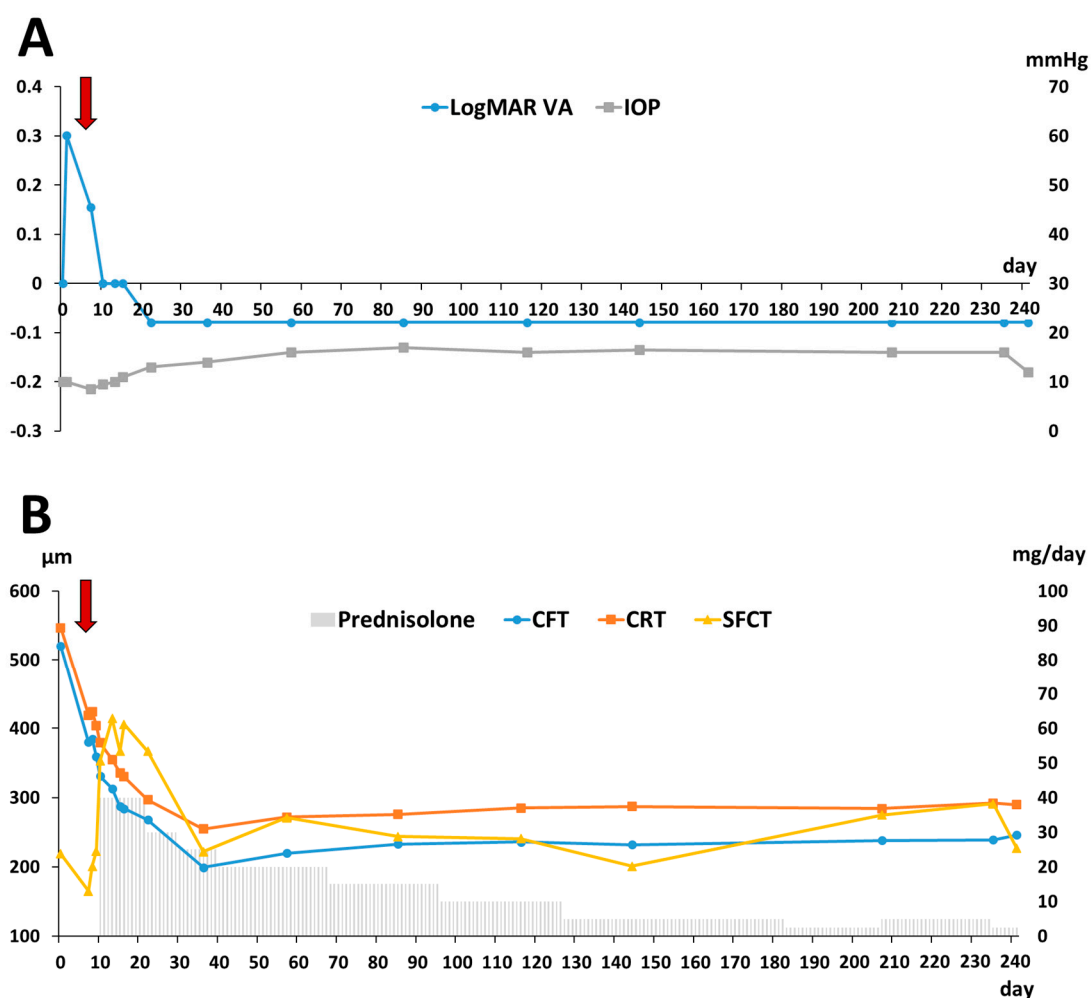

Time courses of (A) logMAR VA, IOP, and (B) dose of prednisolone, CFT, CRT, SFCT in No.2 VKH disease patient under GC therapy are presented.

**Figure S3.** Clinical course of No. 3 VKH disease patient under glucocorticoid therapy.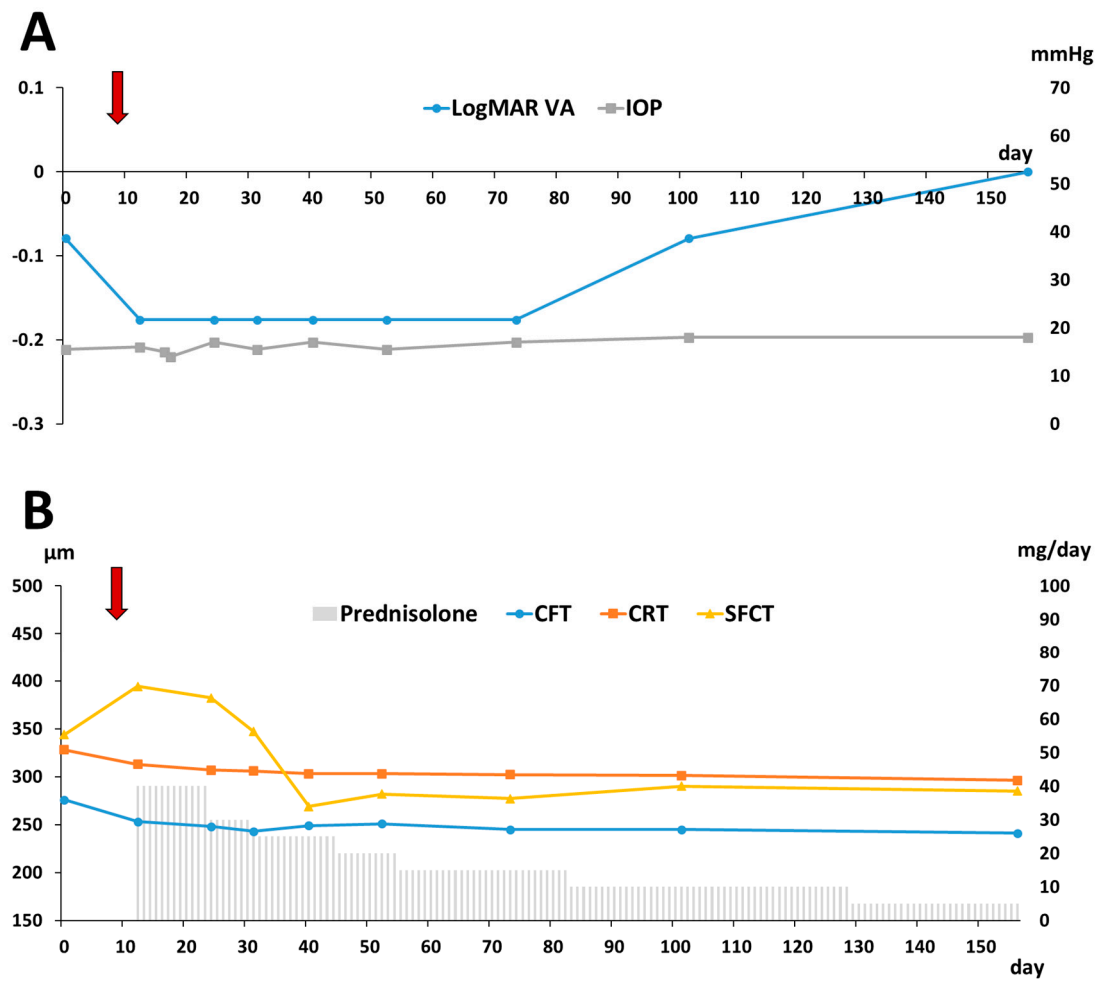

Time courses of (A) logMAR VA, IOP, and (B) dose of prednisolone, CFT, CRT, SFCT in No.3 VKH disease patient under GC therapy are shown.
